# Supplementary material for: Importance, Determinants and Gender Dimensions of Forests for Communities Dawuro Zone, South-West Ethiopia a Case Study of Essera Woreda
Source: Preprints.org preprint supplement (doi:10.20944/preprints202005.0375.v1), 2020-05-23

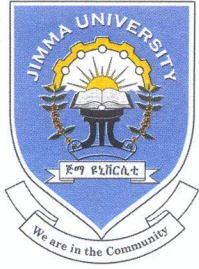

# JIMMA UNIVERSITY

## ጅማ ዩኒቨርሲቲ

**From: College of Agriculture and Veterinary Medicine**  
**Research and Post Graduate Coordination Office**  
**Tel. 047-111-01-44**  
**Fax 047-111-09-34**

ቁጥር  
**Ref.No. B/65/181/2016**  
ቀን  
**Date 5/4/2016**

**To: African Forest Forum (AFF)**  
**Nairobi, Kenya.**

**Subject:- Confirmation Letter**

Under Ethiopian higher educational institutes, the Jimma University College of Agriculture and Veterinary Medicine has different postgraduate programmes. Forest and Nature Conservation (FNC) programme is the one of the well established MSc programme in our college and it is designed to address the current global issues of sustainable forest and nature managements. We would like to confirm that **Bekele Tona Amenu** is one of our postgraduate students pursuing his MSc study in Forest and Nature Conservation programme. The applicant will be doing his MSc thesis in the area of Forest and Nature Conservation under supervision and guidance of **Gudina Legese (PhD)**, an expert scientist in the field. The college will also make sure that any grant (fund) obtained is utilized as per the guideline and policy of the funding agency. To this end, Jimma University College of Agriculture and Veterinary Medicine would like to thank and appreciate any support render to the applicant.

Sincerely,

  
**Dr. Benti Deresa**  
**Research & Post Graduate**  
**Studies Program Coordinator**

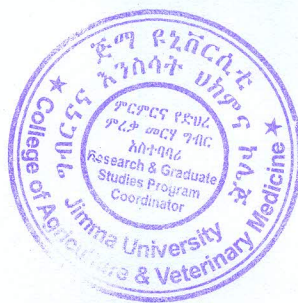

Supplement: Supplementary file 1 [file supplementary]
